# Supplementary material
Source: HighWire-hosted journal article supplement (https://bmjopenquality.bmj.com/highwire/filestream/143574/field_highwire_adjunct_files/6/bmjoq-2021-001472supp007_data_supplement.pdf)

Figure 3  
Process Measures

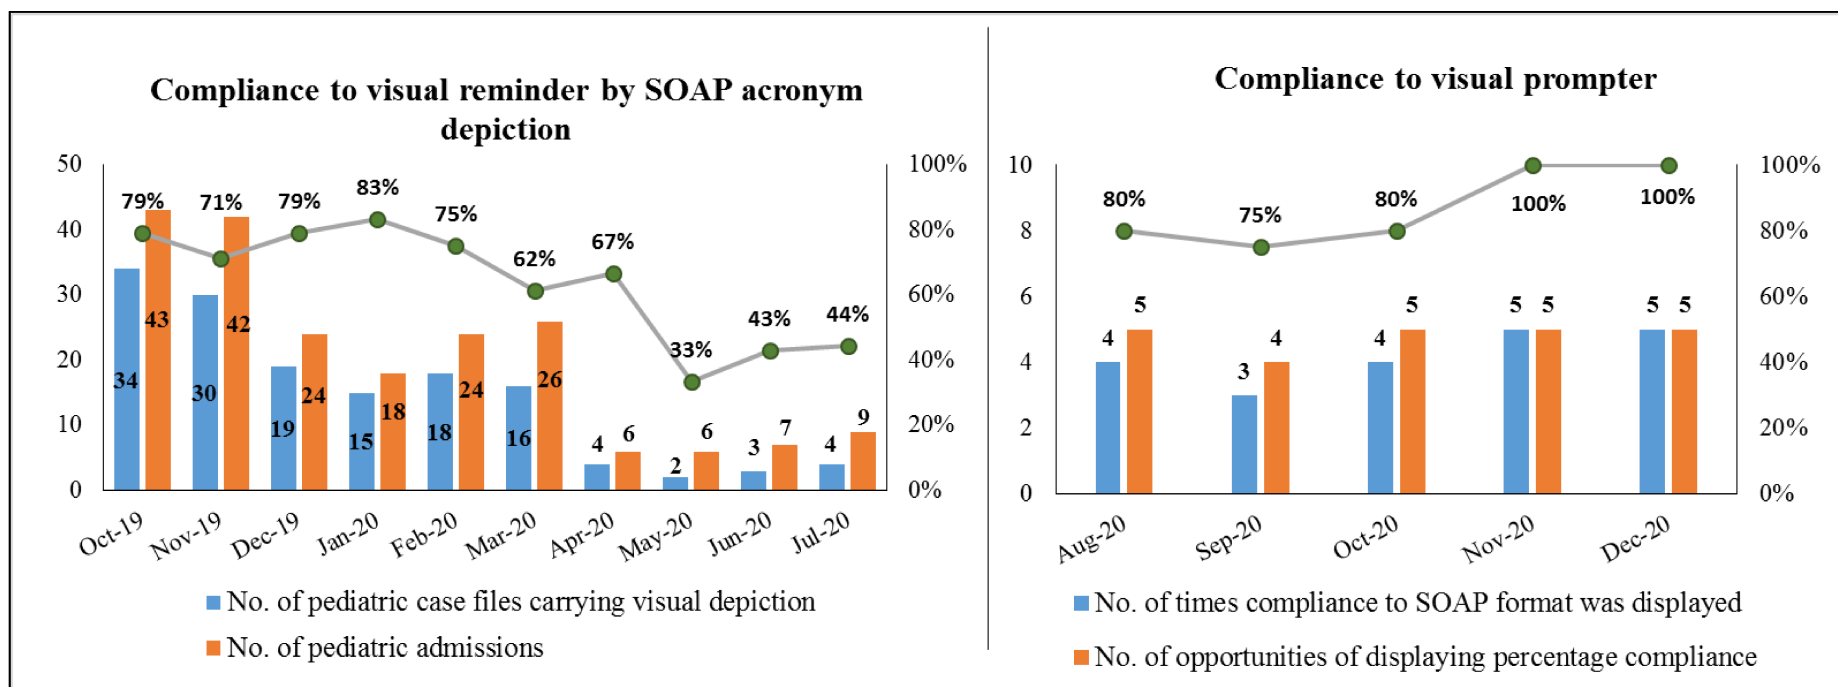

Supplement: bmjoq-2021-001472supp007_data_supplement.pdf [file bmjoq-2021-001472supp007_data_supplement.pdf]
